# Supplementary material for: Genome-wide Association Study Identifies New Loci for Resistance to Leptosphaeria maculans in Canola
Source: PubMed Central journal article supplement (PMC5075532; doi:10.3389/fpls.2016.01513), 2016-10-24

Figure S1: Pair plots showing correlations in genetic variation for resistance to *L. maculans* evaluated using cotyledon test (lesion score), per cent internal canker infection (internal infection) assessed visually and from digital images (digital scores) in a GWAS panel.

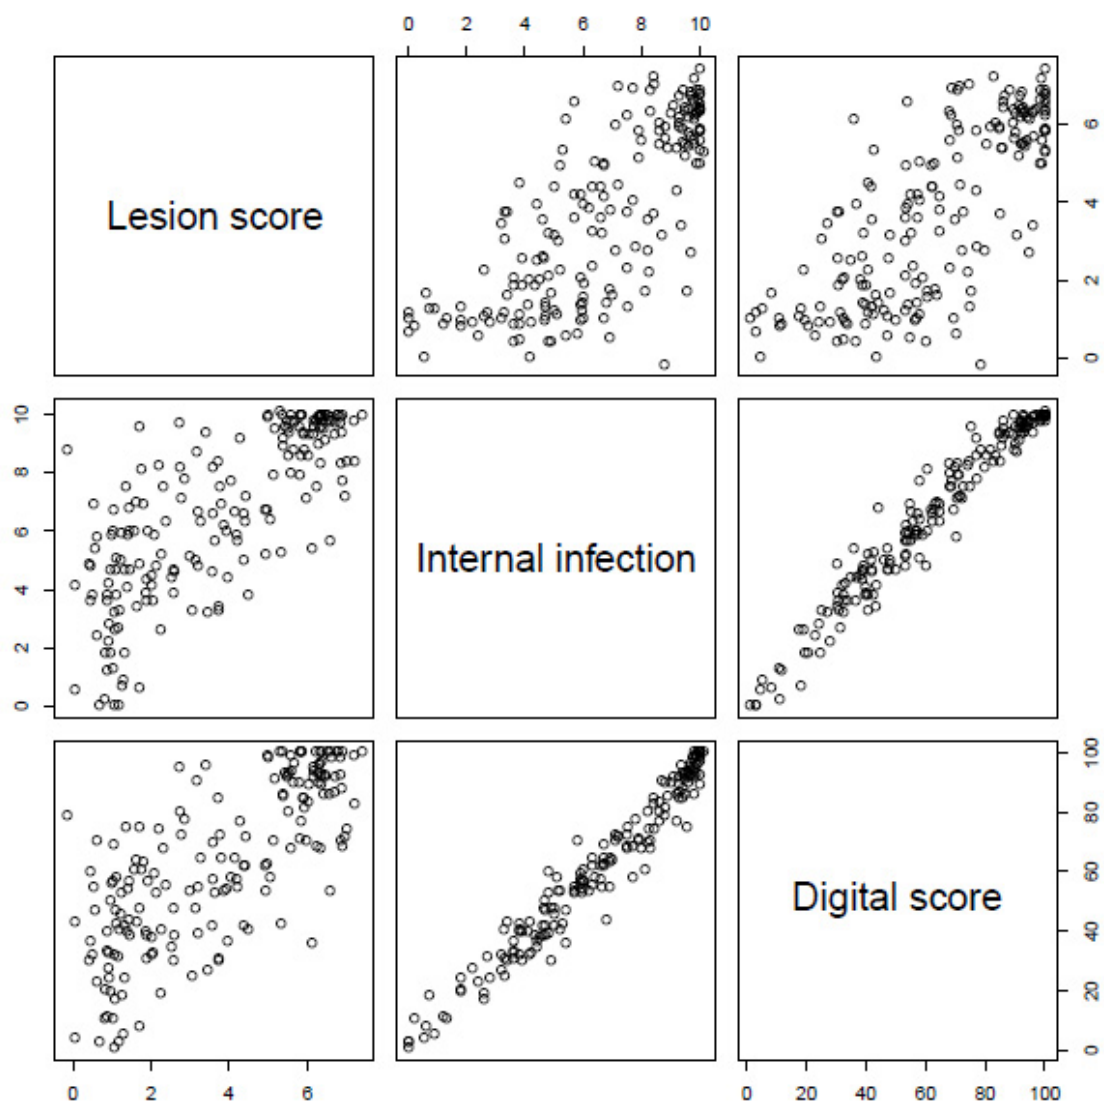

Supplement: Image_1.pdf [file Image_1.pdf]
