# Supplementary material for: Genome-wide Association Study Identifies New Loci for Resistance to Leptosphaeria maculans in Canola
Source: PubMed Central journal article supplement (PMC5075532; doi:10.3389/fpls.2016.01513), 2016-10-24

Figure S4: Comparative genetic and physical mapping of molecular markers linked with *Rlm1* locus for resistance to *L. maculans* isolates D5 (IBCN18) and D7 (IBCN76) in a DH population from the Maxol\*1/Westar-10. Resistance was assessed at the seedling stage (cotyledon) under glasshouse conditions at Wagga Wagga Agricultural Institute.

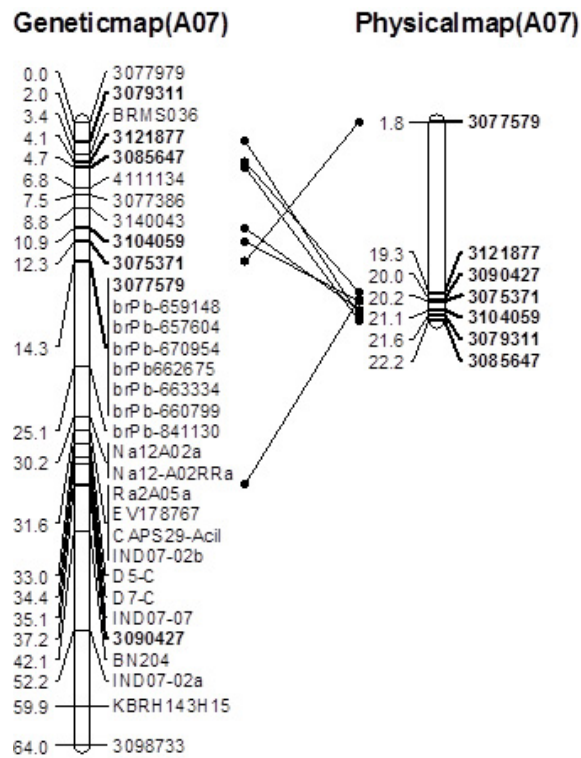

Supplement: Image_4.pdf [file Image_4.pdf]
